# Supplementary material for: A crucial role of angiotensin converting enzyme 2 (ACE2) in SARS coronavirus–induced lung injury
Source: Springer Nature journal article supplement (doi:10.1038/nm1267), 2005-07-10
Supplement: 41591_2005_BFnm1267_MOESM1_ESM.pdf [file 41591_2005_BFnm1267_MOESM1_ESM.pdf]

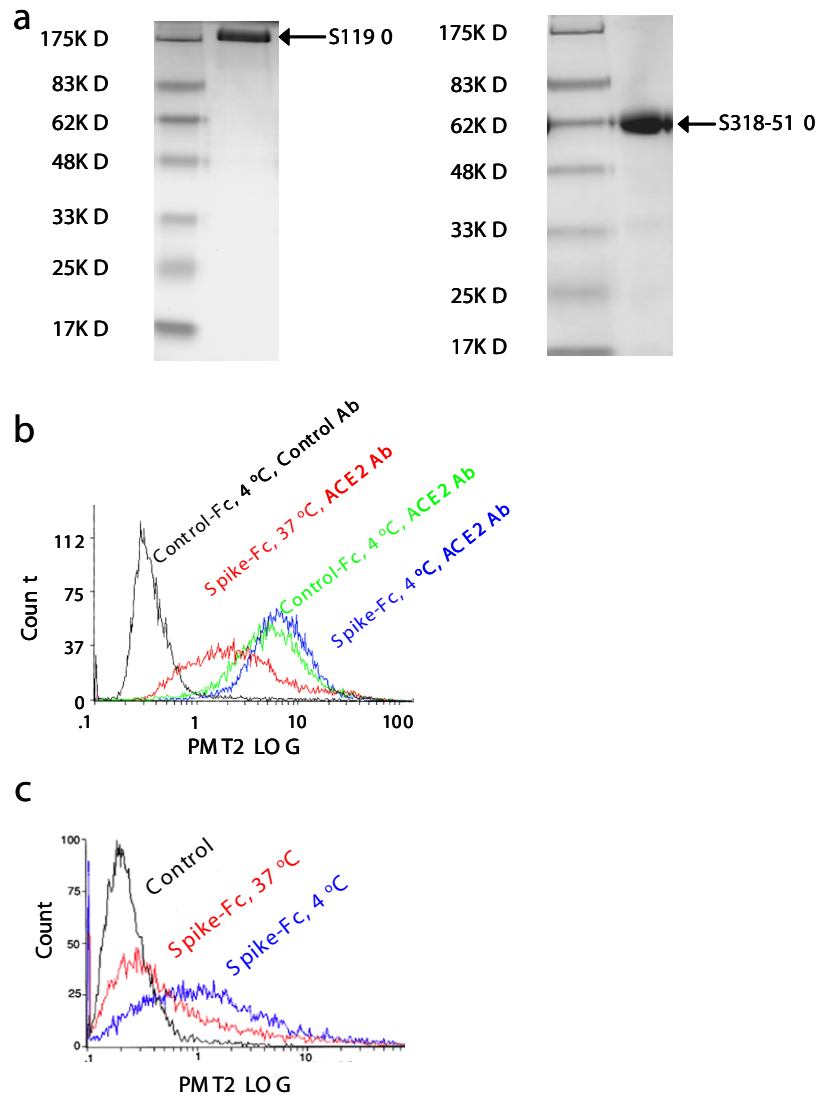

### Supplementary Figure 1. Recombinant Spike-Fc proteins and reduced ACE2 expression by Spike (S318-510)-Fc.

**a**, Commassie blue-stained SDS-PAGE gels of purified recombinant Spike(S1190)-Fc and Spike(S318-510)-Fc proteins isolated from the culture supernatants of transfected CHO cells. Molecular weight markers are indicated. **b**, Decreased cell surface expression of ACE2 following binding to Spike-Fc protein at 37°C (red line) compared to 4°C (blue line) in Vero E6 cells. ACE2 surface expression was detected at 3 hrs of incubation with Spike-Fc using an ACE2-specific monoclonal antibody. Representative FACS histograms are shown including a background control with an isotype matched antibody (black line) and control Fc-treatment followed by a anti-ACE2 staining to exclude unspecific effects of the Fc-fusion protein (green line). **c**, Decreased cell surface expression of ACE2 following binding to Spike (S318-510)-Fc protein at 37°C but not 4°C in Vero E6 cells. ACE2 surface expression was detected at 3 hrs of incubation with Spike(318-510)-Fc using an ACE2-specific monoclonal antibody. Representative FACS analysis is shown including a background control with an isotype matched Ab.
