# Supplementary material for: A crucial role of angiotensin converting enzyme 2 (ACE2) in SARS coronavirus–induced lung injury
Source: Springer Nature journal article supplement (doi:10.1038/nm1267), 2005-07-10
Supplement: 41591_2005_BFnm1267_MOESM2_ESM.pdf [file 41591_2005_BFnm1267_MOESM2_ESM.pdf]

## Supplementary Table 1

| Group              | Alveolar congestion | Hemorrhage  | Neutrophil infiltrates | Alveolar wall thickness | Hyaline membrane formation | Total scores   |
|--------------------|---------------------|-------------|------------------------|-------------------------|----------------------------|----------------|
| saline, Control-Fc | 0.13 ± 0.13         | 0.38 ± 0.18 | 0.63 ± 0.18            | 0.25 ± 0.16             | 0.00 ± 0.00                | 1.38 ± 0.38    |
| saline, Spike-Fc   | 0.13 ± 0.13         | 0.38 ± 0.18 | 0.38 ± 0.18            | 0.13 ± 0.13             | 0.00 ± 0.00                | 1.00 ± 0.33    |
| acid, Control-Fc   | 2.00 ± 0.18         | 2.13 ± 0.22 | 2.63 ± 0.13            | 2.19 ± 0.10             | 2.13 ± 0.20                | 10.31 ± 0.33   |
| acid, Spike-Fc     | 3.38 ± 0.18**       | 3.00 ± 0.20 | 3.75 ± 0.11**          | 3.38 ± 0.18**           | 3.25 ± 0.14**              | 16.63 ± 0.52** |

Data are shown as mean values +/- s.e.m. n = 4 mice per group. See Methods for details of scoring. \*\* p<0.01 between acid plus Spike-Fc versus acid plus control-Fc treated mice
